# Supplementary material for: Protandric Transcriptomes to Uncover Parts of the Crustacean Sex-Differentiation Puzzle
Source: Frontiers journal article supplement (doi:10.3389/fmars.2021.745540), 2021-10-08
Supplement: Data_Sheet_1.DOCX [file Data_Sheet_1.DOCX]

**A**

| **Gene ID** | **Length (bp)** | **Best Blastx hit** |  |
| --- | --- | --- | --- |
| **Accession number** |
| **Hippolyte_Body_TRINITY_DN538_c0_g1** | **8773** | **Vitellogenin [Pandalus hypsinotus]** | [**BAD11098.1**](https://www.ncbi.nlm.nih.gov/protein/BAD11098.1?report=genbank&log$=prottop&blast_rank=1&RID=J8BM7WX0013) |
| Hippolyte_Body_TRINITY_DN12354_c2_g1 | 8217 | Vitellogenin 2 [Pandalus japonicus] | [AHD26978.1](https://www.ncbi.nlm.nih.gov/protein/AHD26978.1?report=genbank&log$=prottop&blast_rank=1&RID=J8BRUV0V013) |
| Hippolyte_Body_TRINITY_DN28703_c0_g1 | 8040 | Vitellogenin [Penaeus japonicus] | [BAD98732.1](https://www.ncbi.nlm.nih.gov/protein/BAD98732.1?report=genbank&log$=prottop&blast_rank=1&RID=J8BSU48F013) |
| Hippolyte_Body_TRINITY_DN57123_c0_g1 | 8001 | Vitellogenin 2 [Pandalus japonicus] | [AHD26978.1](https://www.ncbi.nlm.nih.gov/protein/AHD26978.1?report=genbank&log$=prottop&blast_rank=1&RID=J8BV62VG013) |
| Hippolyte_Body_TRINITY_DN158964_c0_g1 | 7965 | Vitellogenin-like [Homarus americanus] | [XP_042241489.1](https://www.ncbi.nlm.nih.gov/protein/XP_042241489.1?report=genbank&log$=prottop&blast_rank=1&RID=J8BWX8YE013) |

**B**

1 TTGCAGTCAGCTGCCATCatgacttcctcctcattggcagcacctattctgctggctctcctaactctggctgcagccgcaccatggccatcaaacctccccaagtgctcgacagaatgc 120

1 M T S S S L A A P I L L A L L T L A A A A P W P S N L P K C S T E C 34

121 tcaattgctggatctcccaaacttcattattctcctgaaaaaacttatgtatactcatattccggaagatctaccataaagctgaaggatgtggaagacggcaatgctgacatgcaatgg 240

35 S I A G S P K L H **Y S P E K T Y V Y S Y S G R S T I K L K D V E D G N A D M Q W** 74

241 tcctcgcaagtagagttaacctggttaactccgtgtgacatggctatcacagtcaaaaacccttcagttggaggcggtccaggttctccagagtctagtttcctagagaggtatcctttg 360

75 **S S Q V E L T W L T P C D M A I T V K N P S V G G G P G S P E S S F L E R Y P L** 114

361 gttgtagccatgactgacggtcgggttcaaagagcatgtacccatcctgatgatgatgtttggtccataaacttcaaaaagggtattgcatcagcattccagaattctcttccttccaac 480

115 **V V A M T D G R V Q R A C T H P D D D V W S I N F K K G I A S A F Q N S L P S N** 154

481 tcttccatcaattctggactgaacttcacagagactgacattattggaaattgctcaacaaggtatgagattcaaaacgagggtgatgcagtcactgtaaacaaaataaagaatcaccgc 600

155 **S S I N S G L N F T E T D I I G N C S T R Y E I Q N E G D A V T V N K I K N H R** 194

601 ttttgccaagatttatatattaaccaagctgagacacctaggtctttacctaaatctcctttgcctatggaagaatcggtgtcagaatgtaagcaacagatttctaaaggaatctactcc 720

195 **F C Q D L Y I N Q A E T P R S L P K S P L P M E E S V S E C K Q Q I S K G I Y S** 234

721 agcattacttgcaaagacaggaacatcatccgcccatcatttggttcttataagtatgttgaagctcatcaggaatctaccttaagatttcattctgaaacagatcaaactcccgatgca 840

235 **S I T C K D R N I I R P S F G S Y K Y V E A H Q E S T L R F H S E T D Q T P D A**  274

841 attatgagactacaaactcgtcttattccaaatagtctacgatatgatcaacaacgacttaagaaagatccgtcagcaattgccaagctagataatgcattgaagcagatatgcgaaaaa 960

275 **I M R L Q T R L I P N S L R Y D Q Q R L K K D P S A I A K L D N A L K Q I C E K** 314

961 actaaggagtttgcagaggaagagtctgcatcctatgtagctcaagcaattcattatttacgtcgtgttcccgaagaagctatatctcaaactttgcagaagattcgtgaaggacagatt 1080

315 **T K E F A E E E S A S Y V A Q A I H Y L R R V P E E A I S Q T L Q K I R E G Q I** 354

1081 tgcagtgaaaaacaaaaattggagagccttttcttggatggtgtagctttcatccaggaatccggtgcagtcaaggtgatggtgcaagaacttttatccggacgagccactggagggaga 1200

355 **C S E K Q K L E S L F L D G V A F I Q E S G A V K V M V Q E L L S G R A T G G R** 394

1201 acagctctatatgcagctgccatttacttcactcccaggccctgcctccattctattactgctttacaaccacttattgaagaataccaacgttttccaagaatcacactagcagctgct 1320

395 **T A L Y A A A I Y F T P R P C L H S I T A L Q P L I E E Y Q R F P R I T L A A A** 434

1321 tctatggttaatacctactgtagacacaatcctagatgtcaggaagaaactcctgttaggcaacttgctgaagcactaagcaacaaagttagtcaaaaatgctcagcaccaggaaatgag 1440

435 **S M V N T Y C R H N P R C Q E E T P V R Q L A E A L S N K V S Q K C S A P G N E** 474

1441 aaagaaagacaagaatctttggctttattaaaagccctcgctaatatgggtgtaatgaatgaagaaattgccaggccaattatcagctgcattagaaatcaagaggcagacaatagcatt 1560

475 **K E R Q E S L A L L K A L A N M G V M N E E I A R P I I S C I R N Q E A D N S I** 514

1561 cgcatggcatcaactcatgcttttagaaatgttcagtgtcagccacagttaaaggaagtgttaaagcaactagtcaacattgcagttgatccaacaagagatactgaagttcgaattgga 1680

515 **R M A S T H A F R N V Q C Q P Q L K E V L K Q L V N I A V D P T R D T E V R I G** 554

1681 tcttacttagcagcaatcaaatgtgcagattttgcggacattaagaaaatcaccagcaaattatcaacagaggaaaatacacaagtacgtggattcatcatgagccatcttttaaatatt 1800

555 **S Y L A A I K C A D F A D I K K I T S K L S T E E N T Q V R G F I M S H L L** N I 594

1801 caagagtcgagtgccccttacaaggaaaatctaagatatttaatctcaaccgtcatattgcctgcaaacttcacaaatgatatcagaaaatattcccaaaatgttgatttatcatattac 1920

595 Q E S S A P Y K E N L R Y L I S T V I L P A N F T N D I R **K Y S Q N V D L S Y Y** 634

1921 gctccaacatttggtgtaggagcaggaatggaatctaatgtcatatatgctccaggatcatacattcctaggtctttgaaccttaatctaactgcagctctaggagctacaccaatgaac 2040

635 **A P T F G V G A G M E S N V I Y A P G S Y I P R S L N L N L T A A L G A T P M N** 674

2041 ttcggtgaatttggtgtaagatttgaaggattagaatcaataatcgaagatcttcttggccctgaaggttatttgaagaaaaaggatatcactcaagtacttgctgatgtttcatccttt 2160

675 **F G E F G V R F E G L E S I I E D L L G P E G Y L K K K D I T Q V L A D V S S F** 714

2161 atcactaataaatatggaaagatcaaggaacgttttgaatccatatctagggagaggagatctatagatttctctcagatttctcatcttttcgataaactttatggaaacagagattcc 2280

715 **I T N K Y G K I K E R F E S I S R E R R S I D F S Q I S H L F D K L Y G N R D S** 754

2281 cagaagcctaaggccgatttttatgctagaatgggtgaccaggaaatagcctttgcctctcttgcaggagatctgaaaaatatcaatgttgatcaactgattgatagctttttcgactat 2400

755 **Q K P K A D F Y A R M G D Q E I A F A S L A G D L K N I N V D Q L I D S F F D Y** 794

2401 attgaagaaattatgaatagaggacgcaatgctaacatcaattctgcaagagcagcgcagatctacatggactatcatattcccacaatgcaaggtgtccctctgaaaatgaaatttgaa 2520

795 **I E E I M N R G R N A N I N S A R A A Q I Y M D Y H I P T M Q G V P L K M K F E** 834

2521 ggaacaacagttgcttccttgaaattggaatctagcagtggctcaatcaaattcaaacctagcatgtcaacacaaattgaaggatttgttggatttgattatcacgttgcccaagtaggc 2640

835 **G T T V A S L K L E S S S G S I K F K P S M S T Q I E G F V G F D Y H V A Q V G** 874

2641 ctcaaaatgaaaaatcgtatttctacagctgttggatcaagtgtcaatatggtatcttcctctgaaggagaaagctttaacgtagaaattgatatcccagacaaaatggaactcattaac 2760

875 **L K M K N R I S T A V G S S V N M V S S S E G E S F N V E I D I P D K M E L I N** 914

2761 ctgaagagtcaaacttatcttttaaaggcagttactggacaacctgaacacaagattattccatcatctgctggacaaccacgattcatagctcagtcctgctcaaacgcattggaacca 2880

915 L K S Q T Y L L K A V T G Q P E H K I I P S S A G Q P **R F I A Q S C S N A L E P** 954

2881 gcagtaggtctcaagctttgctatgacatcaatatccctaatattttcagaggccaaggtctacctcttggaccactatccacagttaaggtattccttgaaaaatctgaatctggtatg 3000

955 **A V G L K L C Y D I N I P N I F R G Q G L P L G P L S T V K V F L E K S E S G M** 994

3001 aaaggctaccgcctcaaaacaagtcgtctcattacatcaggaaagaaagaattccaaatggaattagaaactagaggatctcaaactccaagaaaagcaaatgctcatctatcctataca 3120

995 **K G Y R L K T S R L I T S G K K E F Q M E L E T R G S Q T P R K A N A H L S Y T** 1034

3121 ggtgaacatgagatgaaaaaagttgaatttgtacttgaatcacagacctctggcggtataaaggtagaattgaaacataaatcatcttcggctgagaaaatgcttgaattggatgtgtac 3240

1035 **G E H E M K K V E F V L E S Q T S G G I K V E L K H K S S S A E K M L E L D V Y** 1074

3241 agcagcccaagcaggcaatatacacaagatagcaaagagattgaagccagtttcagaatgactgtcaatggagatgaatccaatgttgataccctcttccgcacattaggagtgattcgt 3360

1075 **S S P S R Q Y T Q D S K E I E A S F R M T V** N G D E S N V D T L F R T L G V I R 1114

3361 caatatgttgatgttaactttgaagctagtggagactttagattgacagaatcatatagaattccagttccaaaaagattgcgcaaatttgagtattctgttgcctccggaagatggaat 3480

1115 Q Y V D V N F E A S G D F R L T E S Y R I P V P K R L R K F E Y S V A S G R W N 1154

3481 gccatttcattcattcgcaagtcaagtgattctcaatatagttctgcatttaaatttggtcagatgggaaatgaggttatcagtgttgtgggtactcacaacattgagggcagttcttat 3600

1155 A I S F I R K S S D S Q Y S S A F K F G Q M G N E V I S V V G T H N I E G S S Y 1194

3601 tgggatttgagtgtcagaaacacaattaaagctactcttgggagctctcaatttgcgacagaaattaatgtatttaataatgaagagaaaagaggagtatcattgcaagtgagccgacag 3720

1195 W D L S V R N T I K A T L G S S Q F A T E I N V F N N E E K R G V S L Q V S R Q 1234

3721 ggaagcagcacaaaagtactagaagccagtaccatccttgcccgatctggagaaaattacaacctcaacatgcagttggatgttccatcatacattaaggctttaagtttgaaagcaact 3840

1235 G S S T K V L E A S T I L A R S G E N Y N L N M Q L D V P S Y I K A L S L K A T 1274

3841 gcatctagtcaaggtagctcaaagtacatggttgatgctcacgctaagcatggaggaaactcggtagttacaattgaaggaccagtcaccgccaggctatcaacagaagcctctcaaacc 3960

1275 A S S Q G S S K Y M V D A H A K H G G N S V V T I E G P V T A R L S T E A S Q T 1314

3961 tttgaattgtcaacacagttaagagttactttcatcaacagcagtccatatggactaaaaacttctgtttcaatgagtccaagagatcaattggttcaattgaagttgacaaagaattct 4080

1315 F E L S T Q L R V T F I N S S P Y G L K T S V S M S P R D Q L V Q L K L T K N S 1354

4081 gaagatttaatggacttcagttggacaatgaaaactcaggatggacaacagacttcaatggatgttgaattgaatctgcccagcttgatcaagaagtctgttaatgtcatcatcagtgaa 4200

1355 E D L M D F S W T M K T Q D G Q Q T S M D V E L N L P S L I K K S V N V I I S E 1394

4201 aaggtcttccacttaagtgctaatcaagtgctgatgcccaaaagttctccaattagaatgaagggctttgttgatgttgattttgaggcaaagaaagcacaagttgactttgcttgggat 4320

1395 K V F H L S A N Q V L M P K S S P I R M K G F V D V D F E A K K A Q V D F A W D 1434

4321 gctgatcgaagcccaaataagaaagtaaaggccgaagttagcataatcggaggttcttctacaatcagggattccataatccatggaggagttacatatttggagagtacttcccaattt 4440

1435 A D R S P N K K V K A E V S I I G G S S T I R D S I I H G G V T Y L E S T S Q F 1474

4441 aaggcggaactaaacttggccaatcctaacagttggttcactggaagaaatagcatcaaattagatatcacaactccatctcaaaaggcttataaagttaatgctgtcgtgaataaccaa 4560

1475 K A E L N L A N P N S W F T G R N S I K L D I T T P S Q K A Y K V N A V V N N Q 1514

4561 agacaatcttctggacgtcaaatacaaacatcagttacagtcaggacaccagaaagtaatcaatataaatggaactctgattcatctttgcaatggcttggagaatcatacaacatgaag 4680

1515 R Q S S G R Q I Q T S V T V R T P E S N Q Y K W N S D S S L Q W L G E S Y N M K 1554

4681 attacaacccaagctgacttctcatctcctaagggacaacaaacacatattactttggacttgcaaaaccaattgaattcaaggcaacgggactcctacttagaggtccgcatcacaaac 4800

1555 I T T Q A D F S S P K G Q Q T H I T L D L Q N Q L N S R Q R D S Y L E V R I T N 1594

4801 ccatctcttcaacaaccaattaaaactagattagtattgaataatcagcagggacaatataaaactgaatggaagattgaaatgacagccccagctgatggagctatgtatgaattaaga 4920

1595 P S L Q Q P I K T R L V L N N Q Q G Q Y K T E W K I E M T A P A D G A M Y E L R 1634

4921 ctatcacctgagggtggtgttcaatcctttaaggttgaacttgacctgaaagaggttgttcagcttttgaaatcacttgaaacccttgtatcatccagatctatctatacaagcaccggt 5040

1635 L S P E G G V Q S F K V E L D L K E V V Q L L K S L E T L V S S R S I Y T S T G 1674

5041 cgcgaagctaaatatcttgttcaatacaataagcctacacataatgctcacaaaatcttggttaagtcaccatcccggtcaatggaaggagaagctaaatattctgactcagaggtcctc 5160

1675 R E A K Y L V Q Y N K P T H N A H K I L V K S P S R S M E G E A K Y S D S E V L 1714

5161 cttagatttaaacccaatcaagaaatcagcagatccaagtatgaactgtatgctaaacattcatcatcaggtcatgatagaagatttgaaggacatgtcagtcacccagcattagaaaga 5280

1715 L R F K P N Q E I S R S K Y E L Y A K H S S S G H D R R F E G H V S H P A L E R 1754

5281 gactggcaagctaatgttcaatattcaagaaacgaacagaaagtcactggctcattagaattggatatcttccctaatcctgctgatatgataactggtagtctggagtcaacgattgtt 5400

1755 D W Q A N V Q Y S R N E Q K V T G S L E L D I F P N P A D M I T G S L E S T I V 1794

5401 tctgattatacagccattattgaagccaaattaacaggaaaggcactgaaaactaatcctcgattggttttggcggcatctaatggtccaagaaccactggatttgatatcatgttccag 5520

1795 S D Y T A I I E A K L T G K A L K T N P R L V L A A S N G P R T T G F D I M F Q 1834

5521 aagactccatcttcacccgtatctcttcaagtatcaggaaagcttgacaatagctatggcagatatgctgcttcatcattcattgttaagacagagggacaatctgttgtagatatttca 5640

1835 K T P S S P V S L Q V S G K L D N S Y G R Y A A S S F I V K T E G Q S V V D I S 1874

5641 ctatctgcaagacctcatcaatcaccctcctgctatggagtgagagtagaagccaaatcatattcttctcaaattggaacatatgatgtatcagctgaactttgtaaaccagcatttatt 5760

1875 L S A R P H Q S P S C Y G V R V E A K S Y S S Q I G T Y D V S A E L C K P A F I 1914

5761 gaaattgtcactagaaaacatgacagtgacagaatgtatgttgccaagattgggttggagggtcaaaagaatgcagaaatcagcatttcagaagctgatcccgaaactcttgaacgacag 5880

1915 E I V T R K H D S D R M Y V A K I G L E G Q K N A E I S I S E A D P E T L E R Q 1954

5881 gttcttggcatggcccgtgttgttctttcctctccatcactccttaatgccacatacgcgtatgaaaatgaacagattcaatctctaaagaatgctataagagaaaattggtctagactc 6000

1955 V L G M A R V V L S S P S L L N A T Y A Y E N E Q I Q S L K N A I R E N W S R L 1994

6001 tcctcttcagctgcagcatggttagacaatattgcccgtgaagtactcaaagaaggttctggttcaccatcctccaaatttgcaatgctttggcaagaagtcaaggatgaagcttcaaga 6120

1995 S S S A A A W L D N I A R E V L K E G S G S P S S K F A M L W Q E V K D E A S R 2034

6121 atatacgaagacttgaaatatgatagagttattcctagctgggaactcatcaaagagctggcacatagccaaattgtccgtgatgttgcaaatgcatattaccagctttggtcaaaatat 6240

2035 I Y E D L K Y D R V I P S W E L I K E L A H S Q I V R D V A N A Y Y Q L W S K Y 2074

6241 gctcaacttcaagaaacattacgctcagcaacatccaatgctgtgcaggcactgcaaagagaatttgatgatgttaagcaaattttcaatactgttgttattgaaattgcccaaagtgtg 6360

2075 A Q L Q E T L R S A T S N A V Q A L Q R E F D D V K Q I F N T V V I E I A Q S V 2114

6361 ctgtccggagaaattccaatgtgttttgaaaatctgtggaacgaaattcaggagagctcgctctacagaagggtacaaagtgatattgaatcttctatgaacaattatcctgaagacttc 6480

2115 L S G E I P M C F E N L W N E I Q E S S L Y R R V Q S D I E S S M N N Y P E D F 2154

6481 cagggcctcaagcagattgttgaaaagattaaggaaacactaagaagagatatcagtaaccaaaggaagaatgtaatggcatatatgaaacccagaagaatcattgaatggattgtcaat 6600

2155 Q G L K Q I V E K I K E T L R R D I S N Q R K N V M A Y M K P R R I I E W I V N 2194

6601 aagatgagctttgatcgcattgcatttaatggtgtggataagtttgccaagaatattgtgcagaccgtacttttcctacctattcgaatacaaggaaatcaagttcagattgaattgcct 6720

2195 K M S F D R I A F N G V D K F A K N I V Q T V L F L P I R I Q G N Q V Q I E L P 2234

6721 cttcatcgaccagtttattctttgcctcaagctgtttcatatgtgtcacttaacctagttcctactgtcgactcagctctttggtctctggaacctgtgatgcctattcaaattgacaac 6840

2235 L H R P V Y S L P Q A V S Y V S L N L V P T V D S A L W S L E P V M P I Q I D N 2274

6841 ctagtaggggcttactactcatatgttcctcgacatgtaagatatttgctgcctccttacaaccgcactgcagttgttgctgatggaactgaaatcctgacttttgatggagctattcta 6960

2275 L V G A Y Y S Y V P R H V R **Y L L P P Y N R T A V V A D G T E I L T F D G A I L** 2314

6961 cgtgctcctcgttcaccatgcaaggttctcctagcccaatataagactggctccttagtcatgcaaaatagtcaggctacacaattgcctcatttcttcatgaaagtttctagtgtcgca 7080

2315 **R A P R S P C K V L L A Q Y K T G S L V M Q N S Q A T Q L P H F F M K V S S V A** 2354

7081 gtcgaagttaaacctgatttcaaggtatttgtgaatggtcaagaagtcagtggagaccaacaagtccaggatgtcaaagtacataaaacagcagaaaagattgaagttttaacacctttc 7200

2355 **V E V K P D F K V F V N G Q E V S G D Q Q V Q D V K V H K T A E K I E V L T P F** 2394

7201 ttatccctgcgtgtttacaaacagagtcttacagcaactgtagaagcatcaggctggacatttggccgtgttgctggtctcttaggcacttatgatggagaaatgggcaatgattggatg 7320

2395 **L S L R V Y K Q S L T A T V E A S G W T F G R V A G L L G T Y D G E M G N D W M** 2434

7321 acaccttctggttccagggcatcaagcttgcaagaacttgtaagggcatggcaggaagatcaacaatgtcagaccccaagtgtaactcctgtgaaccttcttcaagttccagtacaacaa 7440

2435 **T P S G** S R A S S L Q E L V R A W Q E D Q Q C Q T P S V T P V N L L Q V P V Q Q 2474

7441 atattgagatgtaatgctcttcttggagctcggtctcgttgccatccagttgtccgtccagaagcatttgtgcagatgtgctatccaagtagaaatgcctgtaatgtagcaagagcttac 7560

2475 I L R C N A L L G A R S R C H P V V R P E A F V Q M C Y P S R N A C N V A R A Y 2514

7561 agcgctgtatgctcaaccaaaggagtcaaagatgtttttcctttaggatgttaaATATAACTCACAATGAAAATTCAATTGTCTTATTTGTTATTCAATTTTGAATATTCTGATTCTAGG 7680

2515 S A V C S T K G V K D V F P L G C * 2531

7681 CAAATAACATCTTTAGCTTTAAAATGTCAATTGAATACAATGATTAATACATCAACTTTGAAATTTTATCAAGATTATACATACAGACATCTAAACAATCTTGCTTCTGGAAAATAAATT 7800

7801 ATGAATACCATTTTTATGAAGATTTTACATTTAACCTTGATTATATTATCTGCTACAATTCATATTATATTTTTGTTGATTTGGGCACTACAAGTTCTAAATGGTGAACAGTAAAACAAT 7920

7921 TAACAGTTCTTTTTATGGAATTTTGTTTTGTATTAGATTAAGTAGAATTAAGATATCTTGAGTAACATATACTATTAAAAAAGGTTCATTGAGATATTCTAATAAATATCTAAATGAAAC 8040

8041 AAAATAAGATCTAATAAATGATGTGTCCTGGAATATCATGATCTACAAACAATTGAAATGGAGCTTCATTGAGCATTTTCTTATGTTCAGTAGTAAAACTACTTTGATTTGATATATTTG 8160

8161 GTGGTCATATAGCATCACTAGATTGGAAGTGATAAGCTCTTGAATAAGTCAATAAGATGCATTGTTGAATATTGAAATAATGAAAACTTGTTGAGAAAAAAAATCTTGAAAATACAAAAA 8280

8281 GAGAGCATACTAGATTTGATAACATTTTAGATTGACCAATCTTGCCATGAAAGATCTCTGATAATCTTTTAATTCCTAAAATATACTTCCTTATTGAATGACAGTGTGATATGGTCATTA 8400

8401 TCACACTTAGATACTATTTTGTAAAACAATAGGCCATTTATATATTGAAGATTGTTACAGCTGTAAAAGAATCAAGGAAAATTTGAAGGAAGTATATTTGACATCACGTGTTATAAACAT 8520

8521 TGAGTTCTACAGTATACTACAAATAATTTGACAATGAACCAAAATTTGGTTTGTGGAGTTCTCATGAATATTTGACAATGAGGAAATTGAAAAACATGAAATAGGCTGAGTTTGAATGAA 8640

8641 TATAACTATTCCATAAGGCAAATGCTTTAGGTGTATAAACTTTCAAGCTGTAAAAGTATTCAATTTACAAAATGAGGCATTAGGAATCGTGCA 8733

**FIGURE S1|** Vitellogenin in *Hippolyte inermis*.

(A) The five longest transcripts that were annotated as vitellogenin/vitellogenin-like genes in decapods. The gene ID in the *H. inermis* body transcriptome is given along with the length of the transcript, best blastx hit and accession number. The sequence that was considered as the *Hi-Vg* in this article is highlighted in bold (B)The full sequence of *Hi-Vg* mRNA (Hippolyte_Body_TRINITY_DN538_c0_g1) and its open reading frame (ORF)-deduced amino acids. The signal peptide is highlighted in green. Lipoprotein N-terminal Domain is highlighted in bold on a yellow background, [DUF1943](javascript:domWin(49)) is highlighted in bold on a blue background, [DUF1081](javascript:domWin(65)) is highlighted in bold on a pink background and von Willebrand factor (vWF) type D domain is highlighted in bold on a red background. The start (ATG) and stop (TAA) codons are shown in red and are underlined. The stop codon is also indicated with an asterisk. 5' (top) and 3’ (bottom) UTRs are highlighted with a gray background. The predicted domains of the putative protein were inferred from its deduced amino acids sequence using SMART (http://SMART.embl-heidelberg.de).
